# Supplementary material
Source: Elsevier journal article supplement (https://www.sciencedirect.com/science/article/pii/S2603647921000750)
Supplement: mmc1 [file S2603647921000750:mmc1.docx]

**Anexo** 1: Cuestionario remitido a los residentes

**Impacto de la Epidemia Covid-19 en el Aprendizaje del Residente**

La epidemia COVID nos ha puesto como profesionales en una situación nunca vista. Queremos reflexionar de qué forma os ha **impactado en vuestro aprendizaje**, en vuestra adquisición de competencias y en vuestro ser como médico.

**Edad sexo año de residencia especialidad**

**¿La Epidemia Covid-19 ha influido en tu aprendizaje? SI/NO**

**¿De qué forma positivamente? ¿y negativamente? ¿Te has sentido superado por alguna circunstancia?**

**El balance final ha sido: positivo/negativo**

**Valora durante este periodo cuál ha sido tu ganancia en cada una de las competencias** como profesional (**valora la ganancia en los niveles nada, poco, bastante, mucho**)

|  | nada | poco | bastante | mucho |
| --- | --- | --- | --- | --- |
| **Etica** (aplicar los principios de beneficencia, autonomía, justicia y no maleficencia, manejar con honestidad las situaciones de conflicto ético) |  |  |  |  |
| **Profesionalismo** (proporcionar la más alta calidad de cuidados posibles con integridad, honestidad, altruismo y sentido del deber; anteponer al paciente, respetar a los compañeros; trabajar dentro de límites de tus capacidades) |  |  |  |  |
| **Comunicación con pacientes y familiares** (Establecer una relación terapéutica con pacientes y familiares, basada en la empatía, confianza, confidencialidad y escucha activa, proporcionando la información apropiada, en el momento oportuno y sobre todo en la trasmisión de malas noticias) |  |  |  |  |
| **Comunicación interpersonal y trabajo en equipo** (Contribuir a las actividades de equipos interprofesionales, tomar decisiones consensuadas y transferir la información asegurando la seguridad del paciente, Asumir el liderazgo del equipo cuando la situación lo requiere, priorizando la autoprotección para la salud propia y del equipo) |  |  |  |  |
| **Cuidados del paciente** (Obtener la historia clínica sintetizando la información relevante a partir de los pacientes y familias. Establecer una estrategia diagnóstica usando racionalmente los recursos y desarrollando un juicio clínico adecuado, e instaurar un plan de tratamiento basado en la mejor evidencia disponible y primando la seguridad del paciente) |  |  |  |  |
| **Habilidades técnicas** (Indicar/manejar la técnica o procedimiento adecuado al caso de acuerdo a las guías valorando los riesgos y optimizando los recursos bajo criterios éticos, en coordinación con el equipo de trabajo resolviendo dudas o problemas derivados). |  |  |  |  |
| **Seguridad del Paciente** (identificar la fragilidad del paciente y los posibles riesgos de los procedimientos diagnósticos y terapéuticos, minimizándolos, identificándolos cuando aparecen y comunicándolos al resto del equipo) |  |  |  |  |
| **Gestión de recursos** (Asignar prudentemente los recursos sanitarios limitados, siendo consciente de los costes y el beneficio potencial para cada paciente, y empleando el tiempo dedicado al cuidado del paciente de forma eficiente) |  |  |  |  |
| **Conocimientos médicos, autoaprendizaje y autogestión** (Estar al día de los conocimientos clínicos, preguntándose con rigor y argumentos contrastados. Utilizando el conocimiento y el pensamiento analítico para resolver los problemas clínicos). |  |  |  |  |
| **Gestión de la información** (Buscar e interpretar críticamente la información biomédica y de salud. Gestionando la incertidumbre, evitando la frustración y proponiendo acciones basadas en la mejor evidencia disponible, contrastadas con el equipo interprofesional) |  |  |  |  |
| **Educado**r (Colaborar en el aprendizaje de los compañeros del equipo de trabajo.) |  |  |  |  |
| **Investigación**(Colaborar en la generación de preguntas de interés para el abordaje clínico de los pacientes y/o en su respuesta, a través de registros o proyectos de investigación) |  |  |  |  |

**Señale las 3 competencias en las que ha salido más reforzado por orden de importancia**

**Señale las 3 competencias en las que ha experimentado un déficit formativo previo de cara a su trabajo actual**

**¿Has trabajado con/para pacientes Covid-19 ? Si/no**

**¿Dónde? (urgencias, hospitalización, cuidados intensivos, servicios centrales, centro de salud, IFEMA, otros)**

**¿Has trabajado en tu unidad? Si/no ¿Has mantenido la rotación que estabas realizando? Si/no**

**¿Cuántas guardias has hecho al mes? (número)**

**¿Cuántas horas has trabajado a la semana? 35-40 40-45 >45**

**Sientes que la carga de trabajo durante este periodo ha sido: mayor/igual/menor habitual**

**¿Has presentado síntomas de infección por coronavirus?si/no**

**Nivel de preocupación por la posibilidad de contagiarte: bajo, medio, alto**
